# Supplementary material for: Does Quality of Life in Survivors of Surgery for Acute Left-Sided Infective Endocarditis Differ from Non-Endocarditis Patients?
Source: MDPI journal article supplement (doi:10.3390/microorganisms11041058), 2023-04-18
Supplement: s1 [file s1]

## Annex

**Supplementary Table S1.** Relative weights of the principal component analysis.

|                                  | PCOMP_1  | PCOMP_2    |
|----------------------------------|----------|------------|
| <b>Physical functioning (PF)</b> | 0.366463 | 0.0233605  |
| <b>Role physical (RP)</b>        | 0.365922 | 0.324238   |
| <b>Body pain (BP)</b>            | 0.295466 | 0.573603   |
| <b>General health (GH)</b>       | 0.37818  | 0.200957   |
| <b>Vitality (VT)</b>             | 0.379679 | -0.0945726 |
| <b>Social functioning (SF)</b>   | 0.354612 | 0.0068303  |
| <b>Role emotional (RE)</b>       | 0.329187 | -0.565321  |
| <b>Mental health (MH)</b>        | 0.348845 | -0.443105  |

**Supplementary Table S1.** Relative contribution of each of the SF-36 subcomponents to the two new components (PCOMP\_1 and PCOMP\_2). PCOMP\_1 describes overall health and QoL as all the subcomponents have similar relative weights. In contraposition, PCOMP\_2 express as positive values subcomponents more related to physical performance and negative values those from psychological/mental aspect. Hence, positive values will represent better physical performance over the mental subcomponent, and vice versa.
